# Supplementary material for: Intermolecular interactions in antipyrine-like derivatives 2-halo-N-(1,5-dimethyl-3-oxo-2-phenyl-2,3-dihydro-1H-pyrazol-4-yl)benzamides: X-ray structure, Hirshfeld surface analysis and DFT calculations
Source: Royal Society of Chemistry journal article supplement (doi:10.1039/d0nj03958f), 2020-01-01
Supplement: d0nj03958f1.pdf [file d0nj03958f1.pdf]

**Intermolecular interactions in antipyrine-like derivatives 2-halo-*N*-(1,5-dimethyl-3-oxo-2-phenyl-2,3-dihydro-1-*H*-pyrazol-4-yl)benzamides: X-ray structure, Hirshfeld surface analysis and DFT calculations**

Aamer Saeed,<sup>a\*</sup> Asma Khurshid,<sup>a</sup> Ulrich Flörke,<sup>b</sup> Gustavo A. Echeverría,<sup>c</sup> Oscar E. Piro,<sup>c</sup> Diego M. Gil,<sup>d,\*</sup> Mariana Rocha,<sup>e</sup> Antonio Frontera,<sup>f</sup> Hesham R. El-Seedi,<sup>g,h</sup> Amara Mumtaz,<sup>i</sup> Mauricio F. Erben<sup>i\*</sup>

**ELECTRONIC SUPPLEMENTARY INFORMATION (ESI)**

**Scheme S1.** General mechanism for synthesis of benzamide derivatives of 4-aminophenazone.

**Figure S1.** Optimized molecular structures of compounds 1 and 2 calculated at B3LYP/6-311++G(d,p) level of theory.

**Figure S2.** Energy frameworks along a-axis (above), b-axis (middle), c-axis (bottom) for compound 2, showing separate electrostatic (left, red), and dispersion (middle, green) components, and total energy interactions (right, blue). The tube size (scale factor) used in all energy frameworks was 90 and the cut-off was 5.00 kJ/mol.

**Table S1.** Hirshfeld contact surfaces  $C_{XY}(\%)*$ , proportion of chemical type on the molecular surface  $S_Y(\%)$  and random contacts  $R_{XY}$  and contacts  $R_{XY}(\%)$  of the main intermolecular interactions for compounds 1-2.

---

\* Corresponding authors: [aamersaeed@yahoo.com](mailto:aamersaeed@yahoo.com) (A.S.), [diego.gil@fbqf.unt.edu.ar](mailto:diego.gil@fbqf.unt.edu.ar) (D.M.G.), [erben@quimica.unlp.edu.ar](mailto:erben@quimica.unlp.edu.ar) (M.F.E.).

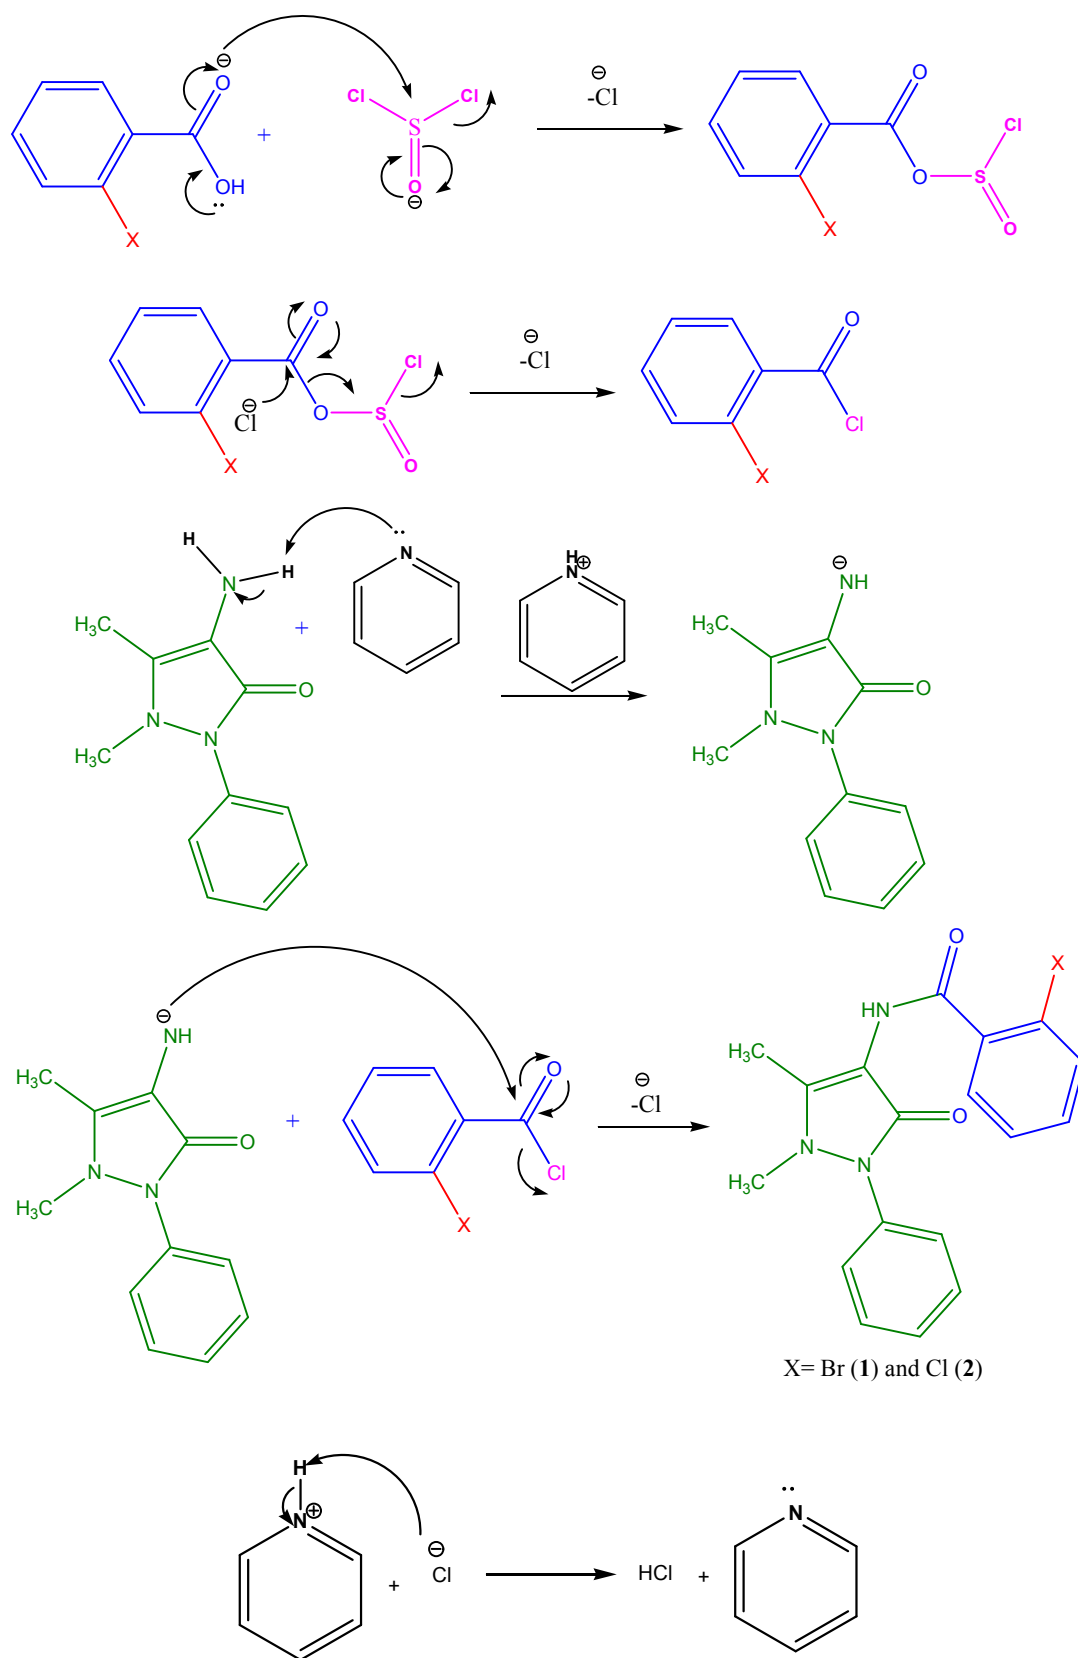

**Scheme S1.** General mechanism for synthesis of benzamide derivatives of 4-aminophenazone.

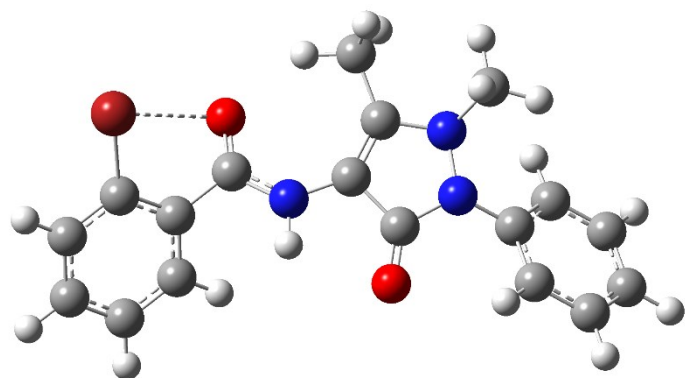

**Compound 1**

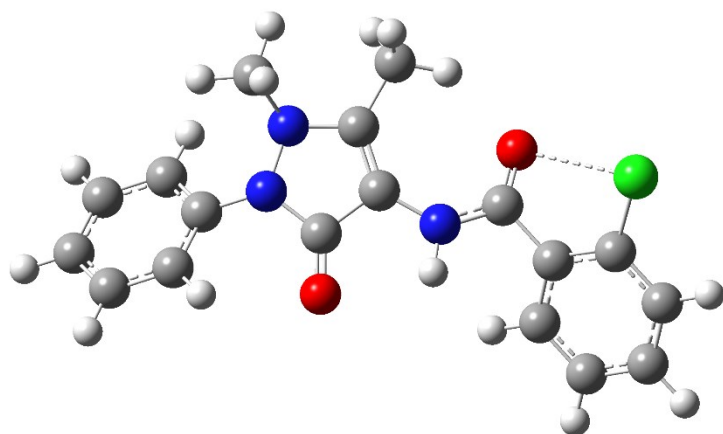

**Compound 2**

**Figure S1**

---

**Compound 2**

---

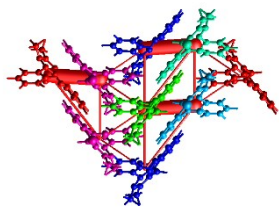

*a*-axis

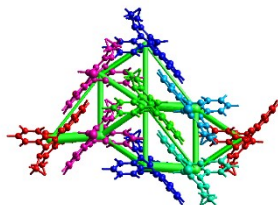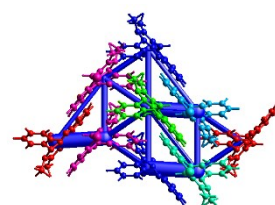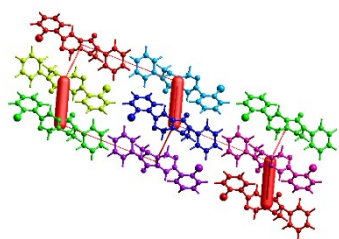

*b*-axis

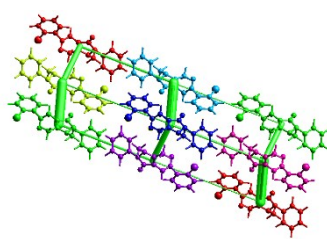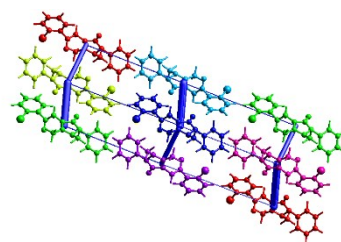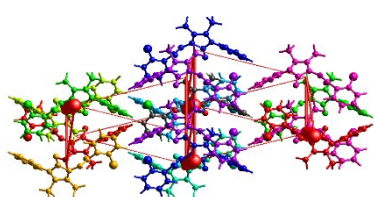

*c*-axis

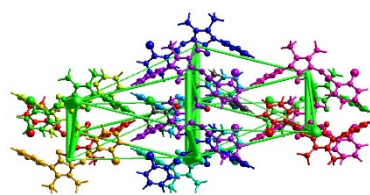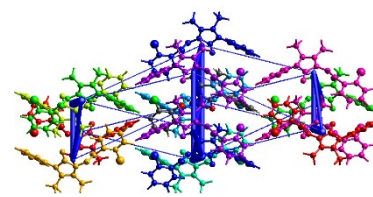

**Figure S2**

**Table S1:** Hirshfeld contact surfaces  $C_{XY}(\%)*$ , proportion of chemical type on the molecular surface  $S_Y(\%)$  and random contacts  $R_{XY}$  and contacts  $R_{XY}(\%)$  of the main intermolecular interactions for compounds **1-2**.

| Contacts $C_{XY}$        | <b>1</b> | <b>2</b> |
|--------------------------|----------|----------|
| H...H/ H...H             | 39.2     | 40.6     |
| H...C/ C...H             | 26.7     | 25.8     |
| H...O/ O...H             | 16.8     | 17.4     |
| H...N/ N...H             | 1.6      | 1.4      |
| H...Br/ Br...H           | 12.5     | -        |
| H...Cl/ Cl...H           | -        | 12.3     |
| C...C                    | 0.2      | 0.2      |
| C...N/ N...C             | 0.7      | 0.8      |
| N...O/ O...N             | 0.3      | 0.3      |
| C...Br/ Br...C           | 1.9      | -        |
| C...Cl/ Cl...C           | -        | 1.33     |
| Surface $S_X$            |          |          |
| H                        | 68       | 69       |
| C                        | 14.9     | 14.2     |
| O                        | 8.6      | 8.9      |
| N                        | 1.3      | 1.2      |
| Br                       | 7.2      | -        |
| Cl                       | -        | 6.8      |
| Random contacts $R_{XY}$ |          |          |
| H...H                    | 46.2     | 47.6     |
| C...H                    | 20.3     | 19.6     |
| O...H                    | 11.7     | 12.3     |
| N...H                    | 1.77     | 1.6      |
| C...C                    | 2.22     | 2        |
| C...N                    | 0.4      | 0.34     |
| N...O                    | 0.22     | 0.2      |
| H...Br                   | 9.8      | -        |
| H...Cl                   | -        | 9.4      |
| C...Br                   | 1.2      | -        |
| C...Cl                   | -        | 1.9      |
